# Supplementary material for: Serum Glycan Signatures of Gastric Cancer
Source: Oxford University Press journal article supplement (doi:10.1158/1940-6207.capr-13-0235), 2013-12-10
Supplement: 19406207capr130235-sup-figleg.pdf [file 19406207capr130235-sup-figleg.pdf]

**Supplementary Figure 1.** Glycans with differential levels in serum from DU, DGC and IGC relative to NAG according to ANOVA analysis. Mean difference as well as 95% confidence intervals are displayed. Glycans with a statistically significant p-value ( $P < 0.1$ ) were included in the graph. Levels of glycans are significantly altered when the 95% C.I. does not hold 0. \* The glycans that showed statistical significance in more than one fraction. \* The glycans that showed statistical significance in more than one fraction.

**Supplementary Table 1.** Glycans detected in serum samples
